# Supplementary material for: A chemiluminescence immunosensor for biomarker detection based on boronic acid-modified magnetic composite microspheres
Source: Royal Society of Chemistry journal article supplement (doi:10.1039/d4tb01582g), 2024-01-01
Supplement: d4tb01582g1.pdf [file d4tb01582g1.pdf]

# Supporting Information

## **Chemiluminescence Immunosensor for Biomarker Detection Based on Boronic Acid-Modified Magnetic Composite Microspheres**

Xiuli Wang, Leyi He, Yaoxia Li, Jia Guo and Changchun Wang\*

State Key Laboratory of Molecular Engineering of Polymers, Shanghai 200433, China.

Corresponding author: C. C. Wang; E-mail address: [ccwang@fudan.edu.cn](mailto:ccwang@fudan.edu.cn)

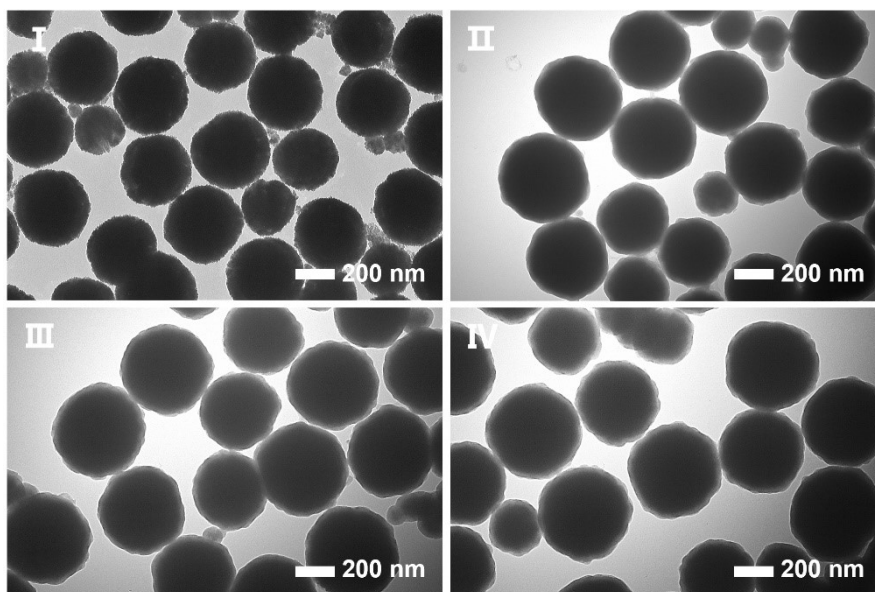

**Fig. S1** TEM images of (I) MSP, (II) MSP@PGMA, (III) MSP@PGMA-SH and (IV) MSP@PGMA-PBA (scale bar: 200 nm).

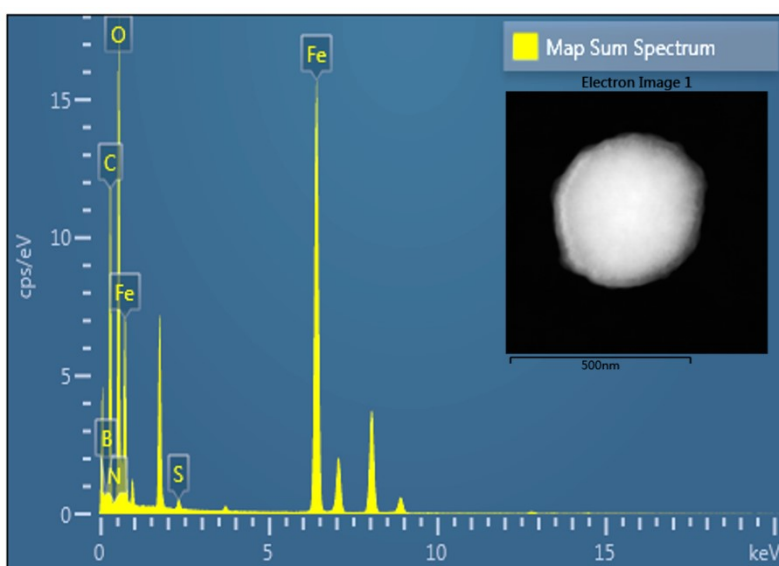

**Fig. S2** SEM-EDS spectrum of MSP@PGMA-PBA microspheres.

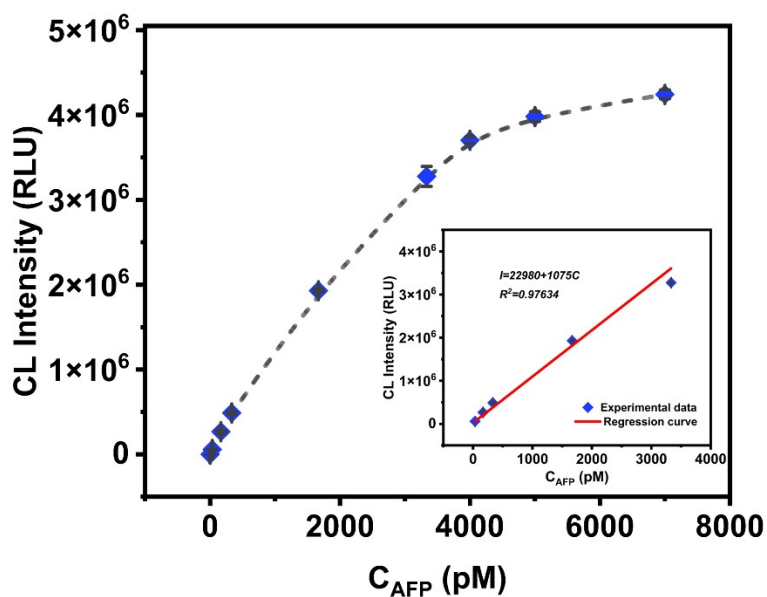

**Fig. S3** The relationship between the CL intensity and AFP concentration in serum, the inset illustrating their linear relationship.

**Table S1.** The elemental content of Fe, S and B in MSP@PGMA-PBA microspheres.

| Sample       | Test element | Element content (mg/kg) |
|--------------|--------------|-------------------------|
| MSP@PGMA-PBA | Fe           | 530076                  |
|              | S            | 5553                    |
|              | B            | 1211                    |

**Table S2.** The chemiluminescence intensity of MSP@PGMA-PBA based immunosensor upon repeated testing of 20 times on blank samples without AFP.

| Number of tests | RLU |
|-----------------|-----|
| 1               | 686 |
| 2               | 674 |
| 3               | 672 |
| 4               | 679 |

|    |     |
|----|-----|
| 5  | 667 |
| 6  | 698 |
| 7  | 699 |
| 8  | 672 |
| 9  | 676 |
| 10 | 680 |
| 11 | 682 |
| 12 | 684 |
| 13 | 686 |
| 14 | 688 |
| 15 | 690 |
| 16 | 692 |
| 17 | 694 |
| 18 | 696 |
| 19 | 698 |
| 20 | 672 |

**Table S3.** Performance comparison of the as-prepared biosensor with other sensors.

| Substrate materials      | Method                       | Type of target | Linear range   | LOD      | Detection time | Ref |
|--------------------------|------------------------------|----------------|----------------|----------|----------------|-----|
| MS                       | Chemiluminescence            | miRNA-21       | 0.01-10000 pM  | 60 fM    | 90 min         | 1   |
| G4 DNAzyme               | Chemiluminescence            | ATP            | 2-2000 $\mu$ M | 84.3 nM  | >75 min        | 2   |
| CdTe-Ru@SiO <sub>2</sub> | Electrochemistry             | ATP            | 10-5000 nM     | 6.68 nM  | 90 min         | 3   |
| Au NPs                   | Electrochemistry             | ATP            | 30-500 nM      | 10 nM    | 370 min        | 4   |
| AuNPs/U-GDY-CP           | Self-powered electrochemical | miRNA-155      | 0.1-10000 fM   | 0.15 fM  | 130 min        | 5   |
| SGDY/AuNPs-CP            | Self-powered electrochemical | miRNA-141      | 1-10000 fM     | 3.0 fM   | overnight      | 6   |
| AuNPs/GDY-CP             | Self-powered electrochemical | miRNA-21       | 0.1-100000 fM  | 0.034 fM | 140 min        | 7   |
| U-GDY/ AuNPs--           | Self-powered                 | miRNA-141      | 0.5-10000 fM   | 0.14 fM  | 180 min        | 8   |

|                |                              |          |              |         |           |           |
|----------------|------------------------------|----------|--------------|---------|-----------|-----------|
| CP             | electrochemical              |          |              |         |           |           |
| AuNPs/U-GOD-CP | Self-powered electrochemical | miRNA-21 | 0.1–10000 fM | 0.04 fM | overnight | 9         |
| MSP@PGMA-PBA   | chemiluminescence            | AFP      | 167-6667 pM  | 8 fM    | 90 min    | This work |

\*MS: magnetic microspheres; G4: quadruplex; GDY: graphdiyne; U-GDY: ultra-thin graphdiyne; SGDY: sandwich graphdiyne; GOD: glucose-oxidase; CP: carbon paper; ATP: adenosine triphosphate

**Table S4.** Performance comparison of the MSP@PGMA-PBA with other magnetic bead system.

| Sample                     | Carboxyl magnetic bead                           | Tosyl magnetic bead                                                        | Our system                         |
|----------------------------|--------------------------------------------------|----------------------------------------------------------------------------|------------------------------------|
| Coupling principle         | Amidation reaction between carboxyl and amino    | Amidation reaction between p-toluenesulfonyl chloride and amino/sulfhydryl | Phenylborate-catechol complexation |
| Group activation treatment | Need (RT/0.5-2h)                                 | No need                                                                    | No need                            |
| Catalyst/reaction promoter | EDC/EDC-NHS (participatory response) (RT/0.5-2h) | Ammonium sulfate (not involved in the reaction) (37°C/24h)                 | No need                            |
| Coupling temperature       | RT                                               | 37 °C                                                                      | 37 °C                              |
| Coupling time              | 1-3h                                             | 18-24h                                                                     | 1-2h                               |
| Coupling pH                | 5 ~ 6.5                                          | 7 ~ 9.5                                                                    | 7.5 ~ 8                            |
| Blocking temperature       | RT                                               | 37 °C                                                                      | 37 °C                              |
| Blocking time              | 1-3h                                             | 6-10h                                                                      | 1-3h                               |

## References

- 1 B.C. Zhou, H.W. Yang, Y. Deng, M. Liu, B. Liu, N.Y. He, and Z.Y. Li, *Sci. China. Chem.*, 2016, **59**, 1051-1058.
- 2 H. Chen, Y. Feng, F. Liu, C. Tan, N. Xu, Y. Jiang, and Y. Tan, *Biosens. Bioelectron.*, 2024, **247**, 115929.

- 3 S.J. Wang, J. Wang, L.F. Zhu, C.X. Li, J.X. Wu, S.G. Ge, and J.H. Yu, *Biosens. Bioelectron.*, 2024, **261**, 116476.
- 4 X. Liu, H. Liu, M. Li, H. Qi, Q. Gao, and C. Zhang, *Chemelectrochem.*, 2017, **4**, 1708-1713.
- 5 J. Xu, Y.B. Liu, Y.J. Li, Y.L. Liu, and K.J. Huang, *Anal. Chem.*, 2023, **95**, 13305-13312.
- 6 J. Xu, Y.B. Liu, K.J. Huang, Y.Y. Hou, X.X. Sun, and J.Q. Li, *Anal. Chem.*, 2023, **94**, 16980-16986.
- 7 Y.Y. Hou, J. Xu, F.T. Wang, Z. Dong, X.C. Tan, K.J. Huang, J.Q. Li, C.Y. Zuo, and S.Q. Zhang, *Anal. Chem.*, 2021, **93**, 15225-15230.
- 8 J. Xu, Y.B. Liu, K.J. Huang, R.J. Wang, and J.Q. Li, *Chem. Eng. J.*, 2023, **466**, 143230.
- 9 F.T. Wang, Y.Y. Hou, X.C. Tan, K.J. Huang, J. Xu, R. and Cai, *Biosens. Bioelectron.*, 2023, **222**, 224933.
